# Supplementary material for: Multi-omics insights into biomarkers of breast cancer associated diabetes: a computational approach
Source: Front Med (Lausanne). 2025 Jun 6;12:1572500. doi: 10.3389/fmed.2025.1572500 (PMC12179083; doi:10.3389/fmed.2025.1572500)
Supplement: SUPPLEMENTARY TABLE 1 — Metadata information of transcriptomics data. [file Table_1.xlsx]

## Sheet: Sheet1
Accession	NAME	Sample ID	Title	Source name	Age	Race	Er status	Diabetes info	Disease grade	Tissue	Diabetes type	Triple-negative	Subtype	Tumor grade	BMI	Node Status	Menopausal Status	Neoadjuvant Therapy	Chemotherapy	Therapy details as available
GSM6138481	Sample1	1_3275	Breast tumors, 41-17624	frozen breast tumors	30	AA	NEG	No	3	breast tumors	No-Dia	0	NA	NA	30 or >	0	0	0	1	Taxotere, radiation therapy
GSM6138458	Sample2	13_9255	Breast tumors, 13-9255	frozen breast tumors	32	EA	NEG	No	3	breast tumors	No-Dia	NA	NA	2	24.9 or <	1	NA	1	1	Chemo agents unknown
GSM6138454	Sample3	16_9763	Breast tumors, 7-8126	frozen breast tumors	33	EA	NEG	No	3	breast tumors	No-Dia	1	Basal	3	30 or >	0	0	0	1	Cytoxan, Adriamycin 5X; Taxol 1X
GSM6138505	Sample4	23_13583	Breast tumors, 74-19989	frozen breast tumors	33	NA	NEG	No	3	breast tumors	No-Dia	0	LumA	1	25-29.9	0	0	0	0
GSM6138517	Sample5	25_15047	Breast tumors, 91-20967	frozen breast tumors	34	NA	POS	No	1	breast tumors	No-Dia	0	LumA	2	24.9 or <	0	1	0	0
GSM6138507	Sample6	37_16718	Breast tumors, 76-20040	frozen breast tumors	40	EA	POS	No	1	breast tumors	No-Dia	1	Basal	3	30 or >	0	0	1	1	Adriamycin pre surgery; Cytoxan, Adriamycin, 5FU
GSM6138519	Sample7	41_17624	Breast tumors, 93-22307	frozen breast tumors	41	AA	POS	No	3	breast tumors	No-Dia	0	HER2	2	30 or >	0	1	0	0	Tamoxifen
GSM6138500	Sample8	50_19048	Breast tumors, 68-19743	frozen breast tumors	42	AA	POS	No	2	breast tumors	No-Dia	0	LumA	1	30 or >	1	1	0	0	Tamoxifen
GSM6138504	Sample9	57_19311	Breast tumors, 73-19952	frozen breast tumors	42	AA	NEG	No	NA	breast tumors	No-Dia	0	HER2	3	24.9 or <	0	0	0	1	Cytoxan 3X liposomal, Adriamycin, Taxotere 7X
GSM6138506	Sample10	66_19703	Breast tumors, 75-19999	frozen breast tumors	43	EA	POS	No	1	breast tumors	No-Dia	1	Basal	3	30 or >	0	1	1	1	Chemo agents unknown, radiation therapy
GSM6138477	Sample11	7_8126	Breast tumors, 37-16718	frozen breast tumors	44	EA	NEG	No	2	breast tumors	No-Dia	1	Basal	3	25-29.9	1	1	0	1	Cytoxan, Adriamycin 3X
GSM6138459	Sample12	73_19952	Breast tumors, 14-9520	frozen breast tumors	45	EA	POS	No	3	breast tumors	No-Dia	NA	NA	NA	24.9 or <	1	NA	1	1	Adriamycin 4X; Cytoxan, Thiotepa
GSM6138467	Sample13	74_19989	Breast tumors, 25-15047	frozen breast tumors	45	AA	NEG	No	3	breast tumors	No-Dia	1	Basal	3	25-29.9	0	0	0	1	Cytoxan, Adriamycin, radiation therapy
GSM6138491	Sample14	88_20878	Breast tumors, 55-19277	frozen breast tumors	45	AA	POS	No	3	breast tumors	No-Dia	1	Basal	3	30 or >	0	1	1	1	Chemotherapy w/ CMF, radiation therapy
GSM6138493	Sample15	14_9520	Breast tumors, 57-19311	frozen breast tumors	45	AA	NEG	No	3	breast tumors	No-Dia	0	LumA	1		1	1	0	0
GSM6138499	Sample16	18_9791	Breast tumors, 66-19703	frozen breast tumors	45	AA	NEG	No	3	breast tumors	No-Dia	0	HER2	3	24.9 or <	0	1	NA	0
GSM6138474	Sample17	27_15425	Breast tumors, 34-16301	frozen breast tumors	46	AA	POS	No	3	breast tumors	No-Dia	0	NA	NA		0	1	0	0	Tamoxifen, radiation therapy
GSM6138478	Sample18	28_15703	Breast tumors, 38-17014	frozen breast tumors	46	AA	POS	Yes	3	breast tumors	II	1	Basal	2	24.9 or <	1	1	0	1	Cytoxan 2X, Methotrexate, 5FU 3X
GSM6138455	Sample19	33_16087	Breast tumors, 8-8142	frozen breast tumors	47	EA	POS	No	2	breast tumors	No-Dia	1	Basal	3	24.9 or <	0	0	0	1	Chemo agents unknown
GSM6138503	Sample20	34_16301	Breast tumors, 72-19943	frozen breast tumors	47	AA	NEG	Yes	3	breast tumors	II	1	Basal	3	30 or >	0	NA	1	1	Taxotere pre surgery
GSM6138471	Sample21	45_18243	Breast tumors, 30-15842	frozen breast tumors	48	AA	POS	Yes	3	breast tumors	II	0	LumA	2	30 or >	2	1	1	1	Adriamycin pre surgery; Cytoxan, 5FU, Methotrexate 4X
GSM6138508	Sample23	49_18996	Breast tumors, 77-20069	frozen breast tumors	49	AA	POS	No	2	breast tumors	No-Dia	0	LumA	3	30 or >	1	1	0	0	Tamoxifen
GSM6138470	Sample24	51_19065	Breast tumors, 29-15800	frozen breast tumors	50	AA	POS	Yes	1	breast tumors	II	0	NA	NA		1	NA	NA	0
GSM6138453	Sample26	59_19436	Breast tumors, 6-7553	frozen breast tumors	51	AA	NEG	Yes	3	breast tumors	II	0	HER2	3	25-29.9	0	0	NA	NA
GSM6138483	Sample27	62_19554	Breast tumors, 45-18243	frozen breast tumors	52	EA	POS	No	3	breast tumors	No-Dia	0	HER2	3	25-29.9	0	1	0	0	Tamoxifen
GSM6138448	Sample28	68_19743	Breast tumors, 1-3275	frozen breast tumors	54	AA	NEG	No	3	breast tumors	No-Dia	1	Basal	3	25-29.9	1	0	0	1	8 months chemo Adriamycin, Cytoxan, Taxol, Taxotere, Topotecam, radiation therapy
GSM6138515	Sample29	75_19999	Breast tumors, 88-20878	frozen breast tumors	54	AA	NEG	No	3	breast tumors	No-Dia	0	LumA	3	30 or >	0	1	0	0	Tamoxifen
GSM6138496	Sample30	76_20040	Breast tumors, 62-19554	frozen breast tumors	55	AA	POS	No	3	breast tumors	No-Dia	0	HER2	2		2	1	NA	0	Tamoxifen, radiation therapy
GSM6138457	Sample31	77_20069	Breast tumors, 12-9246	frozen breast tumors	56	AA	NEG	Yes	3	breast tumors	I	0	LumA	3	25-29.9	0	1	1	1	Taxol; pre surgery chemo Cytoxin, Adriamycin, radiation therapy
GSM6138469	Sample32	78_20170	Breast tumors, 28-15703	frozen breast tumors	57	AA	POS	No	3	breast tumors	No-Dia	0	NA	1	30 or >	0	0	0	NA
GSM6138492	Sample34	83_20695	Breast tumors, 56-19297	frozen breast tumors	57	AA	NEG	Yes	2	breast tumors	I	0	HER2	3	25-29.9	0	NA	0	1	Chemo agents unknown, radiation therapy
GSM6138501	Sample35	89_20925	Breast tumors, 70-19826	frozen breast tumors	57	AA	NEG	Yes	NA	breast tumors	II	0	HER2	2	30 or >	1	1	NA	1	Chemo agents unknown
GSM6138487	Sample36	91_20967	Breast tumors, 49-18996	frozen breast tumors	58	EA	POS	No	1	breast tumors	No-Dia	NA	NA	3	25-29.9	0	0	0	0
GSM6138460	Sample37	93_22307	Breast tumors, 15-9525	frozen breast tumors	59	AA	POS	Yes	3	breast tumors	I	0	LumA	NA	30 or >	0	NA	0	0
GSM6138461	Sample38	10_8254	Breast tumors, 16-9763	frozen breast tumors	59	AA	NEG	No	3	breast tumors	No-Dia	0	HER2	2	24.9 or <	2	0	0	0	Tamoxifen, radiation therapy
GSM6138465	Sample39	12_9246	Breast tumors, 23-13583	frozen breast tumors	59	AA	POS	No	3	breast tumors	No-Dia	0	LumA	3	24.9 or <	1	0	0	0	Tamoxifen, radiation therapy
GSM6138479	Sample40	2_3279	Breast tumors, 39-17268	frozen breast tumors	59	AA	NEG	Yes	3	breast tumors	II	0	HER2	2	30 or >	1	0	0	1	Cytoxan, Adriamycin; Taxol, radiation and hormone therapy
GSM6138472	Sample41	21_12645	Breast tumors, 32-16086	frozen breast tumors	60	AA	NEG	Yes	3	breast tumors	II	NA	NA	3	30 or >	0	1	0	0
GSM6138486	Sample42	32_16086	Breast tumors, 48-18973	frozen breast tumors	60	EA	NEG	Yes	3	breast tumors	II	0	HER2	3		2	1	0	0
GSM6138485	Sample43	36_16666	Breast tumors, 47-18669	frozen breast tumors	61	AA	POS	No	2	breast tumors	No-Dia	0	HER2	3	25-29.9	1	NA	0	1	Chemo agents unknown
GSM6138510	Sample44	39_17268	Breast tumors, 83-20695	frozen breast tumors	61	AA	POS	No	1	breast tumors	No-Dia	1	Basal	2	30 or >	0	1	0	0
GSM6138513	Sample45	43_17952	Breast tumors, 86-20805	frozen breast tumors	61	AA	POS	Yes	NA	breast tumors	II	0	LumA	2	25-29.9	2	1	0	0	Tamoxifen, radiation therapy
GSM6138449	Sample46	48_18973	Breast tumors, 2-3279	frozen breast tumors	63	AA	NEG	Yes	2	breast tumors	II	1	NA	3	30 or >	1	0	0	1	Chemo agents unknown, radiation therapy
GSM6138490	Sample47	56_19297	Breast tumors, 54-19274	frozen breast tumors	63	AA	POS	Yes	3	breast tumors	II	1	NA	2	30 or >	0	0	0	0
GSM6138495	Sample48	6_7553	Breast tumors, 61-19526	frozen breast tumors	63	AA	POS	Yes	2	breast tumors	II	0	HER2	3	24.9 or <	0	1	0	0	radiation therapy
GSM6138464	Sample49	70_19826	Breast tumors, 21-12645	frozen breast tumors	64	EA	NEG	Yes	2	breast tumors	II	0	HER2	2	30 or >	0	0	0	1	chemo TAC, Zoladex, Tamoxifen
GSM6138452	Sample51	15_9525	Breast tumors, 5-6335	frozen breast tumors	66	EA	POS	Yes	1	breast tumors	II	0	LumA	1	24.9 or <	1	1	0	0
GSM6138497	Sample52	20_12424	Breast tumors, 64-19566	frozen breast tumors	68	AA	POS	Yes	3	breast tumors	II	0	LumA	1	24.9 or <	0	1	0	0	Tamoxifen
GSM6138514	Sample53	24_15046	Breast tumors, 87-20874	frozen breast tumors	69	AA	POS	Yes	2	breast tumors	II	0	LumA	3	30 or >	0	0	0	1	Chemo agents unknown, tamoxifen
GSM6138475	Sample54	29_15800	Breast tumors, 35-16404	frozen breast tumors	71	AA	POS	Yes	2	breast tumors	II	NA	NA	NA	24.9 or <	NA	1	1	1	pre surgery chemo, Herceptin, Cisplatin, Taxanes, radiation therapy
GSM6138463	Sample55	3_4663	Breast tumors, 20-12424	frozen breast tumors	72	AA	POS	Yes	1	breast tumors	I	0	LumA	2	24.9 or <	0	1	0	1	Chemo agents unknown, radiation therapy
GSM6138456	Sample59	4_6076	Breast tumors, 10-8254	frozen breast tumors	74	EA	NEG	Yes	3	breast tumors	II	0	LumA	1	30 or >	1	0	0	1	Taxotere, Adriamycin, radiation therapy
GSM6138462	Sample60	40_17351	Breast tumors, 18-9791	frozen breast tumors	76	AA	POS	No	3	breast tumors	No-Dia	1	Basal	3	30 or >	1	0	0	1	Adriamycin, Cytoxin, Taxol
GSM6138498	Sample61	46_18395	Breast tumors, 65-19576	frozen breast tumors	76	AA	POS	Yes	2	breast tumors	II	1	Basal	3	24.9 or <	0	0	0	1	Chemo agents unknown
GSM6138516	Sample62	5_6335	Breast tumors, 89-20925	frozen breast tumors	76	AA	POS	No	2	breast tumors	No-Dia	0	HER2	3	24.9 or <	0	NA	0	0
GSM6138480	Sample63	54_19274	Breast tumors, 40-17351	frozen breast tumors	77	AA	POS	Yes	2	breast tumors	II	1	Basal	3	24.9 or <	1	1	0	1	Cytoxin, Adriamycin, Taxotere, Xeloda, radiation therapy
GSM6138488	Sample64	61_19526	Breast tumors, 50-19048	frozen breast tumors	77	AA	NEG	No	3	breast tumors	No-Dia	0	LumA	2	30 or >	1	1	0	1	Taxotere, Topotecan, radiation therapy
GSM6138502	Sample65	64_19566	Breast tumors, 71-19842	frozen breast tumors	79	AA	POS	Yes	1	breast tumors	II	0	HER2	3	30 or >	0	1	0	1	Chemo agents unknown, radiation therapy
GSM6138451	Sample66	65_19576	Breast tumors, 4-6076	frozen breast tumors	81	AA	POS	Yes	2	breast tumors	II	0	LumA	2	25-29.9	0	0	0	0	Tamoxifen
GSM6138466	Sample67	71_19842	Breast tumors, 24-15046	frozen breast tumors	81	AA	POS	Yes	2	breast tumors	II	0	LumA	2	25-29.9	0	0	0	0	Tamoxifen
GSM6138468	Sample68	84_20698	Breast tumors, 27-15425	frozen breast tumors	81	EA	POS	No	2	breast tumors	No-Dia	0	LumA	1	25-29.9	0	1	0	0	Tamoxifen
GSM6138511	Sample69	85_20736	Breast tumors, 84-20698	frozen breast tumors	82	AA	POS	Yes	2	breast tumors	II	1	Basal	3	24.9 or <	1	0	0	1	Taxol, Adriamycin, Cytoxan, radiation therapy
GSM6138512	Sample70	86_20805	Breast tumors, 85-20736	frozen breast tumors	83	AA	POS	Yes	2	breast tumors	I	0	LumA	1	25-29.9	1	0	0	1	Chemo TAC; Tamoxifen, Lupron, radiation therapy
GSM6138518	Sample71	87_20874	Breast tumors, 92-21325	frozen breast tumors	84	AA	POS	Yes	3	breast tumors	II	0	LumA	2	30 or >	1	0	0	1	Taxotere, Adriamycin, Cytoxan, Tamoxifen
GSM6138489	Sample72	92_21325	Breast tumors, 51-19065	frozen breast tumors	89	EA	POS	No	NA	breast tumors	No-Dia	0	HER2	2	30 or >	1	1	0	1	Chemo-CALGB, AC, Herceptin, Arimidex, radiation therapy
GSM6138450	Sample73	96_26666	Breast tumors, 3-4663	frozen breast tumors	91	AA	POS	Yes	2	breast tumors	II	NA	Basal	2	30 or >	0	1	0	1	Adriamycin, Cytoxan, radiation therapy
#RACE - AA (African American);EA (European American)
